# Supplementary material for: An immune cell infiltration-related gene signature predicts prognosis for bladder cancer
Source: PubMed Central journal article supplement (PMC8370985; doi:10.1038/s41598-021-96373-w), 2021-08-17
Supplement: 41598_2021_96373_MOESM2_ESM.pdf [file 41598_2021_96373_MOESM2_ESM.pdf]

# An Immune Cell Infiltration-Related Gene Signature Predicts Prognosis for Bladder Cancer

Hualin Chen<sup>1</sup>, Yang Pan<sup>1</sup>, Xiaoxiang Jin<sup>1</sup>, Gang Chen<sup>1\*</sup>

<sup>1</sup> Department of Urology, The First Affiliated Hospital of Chongqing Medical University, Chongqing, China

\* **Correspondence:**

Gang Chen

chengang2308@163.com

+86-13668039053

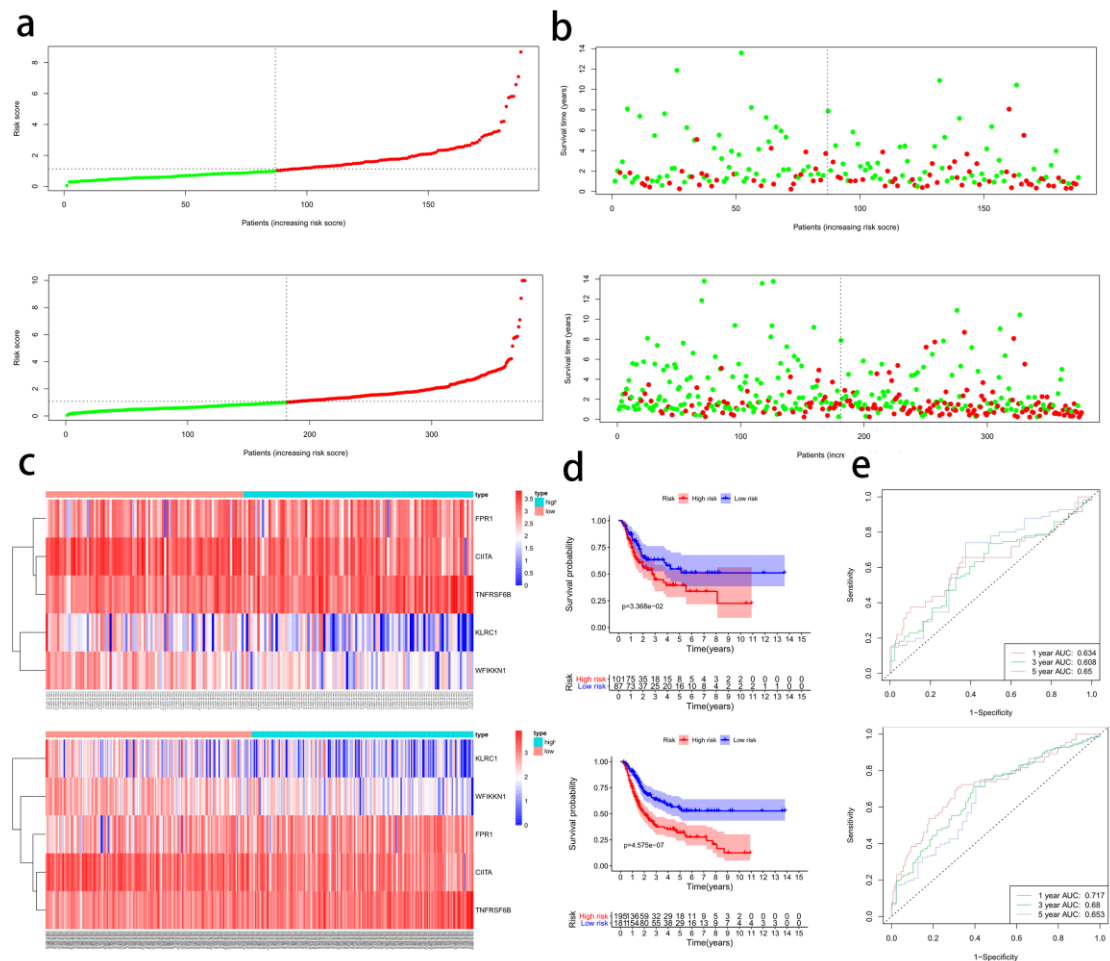

Supplementary Figure 2

Evaluation of the prognosis prediction power of the five PIRMGs signature in the testing and entire cohorts. **(a)** Distribution of risk score. **(b)** Survival status of BCa patients. **(c)** The expression profiles of the five PIRMGs. **(d)** KM survival analysis of the high- and low-risk groups. **(e)** Time-dependent ROC curve of the signature. In each

panel, the upper and lower images correspond to the training and entire cohorts, respectively.
